# Supplementary material for: Moderating factors influence the relative age effect in Australian cricket
Source: PeerJ. 2019 May 17;7:e6867. doi: 10.7717/peerj.6867 (PMC6526896; doi:10.7717/peerj.6867)
Supplement: Dataset S1 [file peerj-07-6867-s001.xlsx]

## Sheet: Chi-Square Goodness of Fit
U17 Male (2012 - 2015)						U17 Male (2012 - 2015; Allrounder)						U17 Male (2012 - 2015; Batters)						U17 Male (2012 - 2015; Pace Bowlers)						U17 Male (2012 - 2015; Spin Bowlers)						U17 Male (2012 - 2015; Wicket Keepers)
	Actual	Expected	X2	Actual %			Actual	Expected	X2	Actual %			Actual	Expected	X2	Actual %			Actual	Expected	X2	Actual %			Actual	Expected	X2	Actual %			Actual	Expected	X2	Actual %
Q1	161	113.839	19.5379	35.5408	25.1342	Q1	34	19.8527	10.0816	43.038		Q1	60	45.234	4.82015	33.3333		Q1	49	30.156	11.7753	40.8333		Q1	13	12.3137	0.0382507	26.5306		Q1	5	6.0312	0.176312	20.8333
Q2	110	126.523	2.15776	24.2826	27.9291	Q2	18	22.0647	0.748788	22.7848		Q2	49	50.274	0.0322846	27.2222		Q2	28	33.516	0.907813	23.3333		Q2	11	13.6857	0.527045	22.449		Q2	3	6.7032	2.04584	12.5
Q3	90	106.455	2.54349	19.8675	23.5	Q3	13	18.565	1.66815	16.4557		Q3	37	42.3	0.664066	20.5556		Q3	24	28.2	0.625532	20		Q3	10	11.515	0.199325	20.4082		Q3	6	5.64	0.0229787	25
Q4	92	106.183	1.89449	20.3091	23.4367	Q4	14	18.5176	1.10212	17.7215		Q4	34	42.192	1.59056	18.8889		Q4	19	28.128	2.96219	15.8333		Q4	15	11.4856	1.07535	30.6122		Q4	10	5.6256	3.40148	41.6667
	453	453	26.1336	100			79	79	13.6006	100			180	180	7.10706	100			120	120	16.2708	100			49	49	1.83997	100			24	24	5.64661	100
p-value	8.94239e-06					p-value	0.0035024					p-value	0.0685625					p-value	0.000997825					p-value	0.606276					p-value	0.130128
U19 Male (2012 - 2015)						U19 Male (2012 - 2015; Allrounder)						U19 Male (2012 - 2015; Batters)						U19 Male (2012 - 2015; Pace Bowlers)						U19 Male (2012 - 2015; Spin Bowlers)						U19 Male (2012 - 2015; Wicket Keepers)
	Actual	Expected	X2	Actual %			Actual	Expected	X2	Actual %			Actual	Expected	X2	Actual %			Actual	Expected	X2	Actual %			Actual	Expected	X2	Actual %			Actual	Expected	X2	Actual %
Q1	154	113.336	14.5896	34.1463		Q1	24	18.0936	1.92806	33.3333		Q1	62	45.7366	5.78307	34.0659		Q1	47	28.3969	12.1871	41.5929		Q1	13	13.5702	0.023959	24.0741		Q1	8	7.539	0.0281895	26.6667
Q2	117	125.964	0.637948	25.9424		Q2	19	20.1096	0.0612251	26.3889		Q2	52	50.8326	0.02681	28.5714		Q2	26	31.5609	0.979808	23.0088		Q2	16	15.0822	0.0558511	29.6296		Q2	4	8.379	2.28854	13.3333
Q3	89	105.985	2.72199	19.7339		Q3	13	16.92	0.90818	18.0556		Q3	39	42.77	0.33231	21.4286		Q3	21	26.555	1.16204	18.5841		Q3	11	12.69	0.225067	20.3704		Q3	5	7.05	0.596099	16.6667
Q4	91	105.714	2.0481	20.1774		Q4	16	16.8768	0.0455524	22.2222		Q4	29	42.6608	4.37445	15.9341		Q4	19	26.4872	2.11642	16.8142		Q4	14	12.6576	0.142368	25.9259		Q4	13	7.032	5.06499	43.3333
	451	451	19.9977	100			72	72	2.94302	100			182	182	10.5166	100			113	113	16.4454	100			54	54	0.447245	100			30	30	7.97782	100
p-value	0.00016993					p-value	0.400494					p-value	0.0146484					p-value	0.000918829					p-value	0.930319					p-value	0.0464724
U15 Male (2012 - 2015)						U15 Male (2012 - 2015; Allrounder)						U15 Male (2012 - 2015; Batters)						U15 Male (2012 - 2015; Pace Bowlers)						U15 Male (2012 - 2015; Spin Bowlers)						U15 Male (2012 - 2015; Wicket Keepers)
	Actual	Expected	X2	Actual %			Actual	Expected	X2	Actual %			Actual	Expected	X2	Actual %			Actual	Expected	X2	Actual %			Actual	Expected	X2	Actual %			Actual	Expected	X2	Actual %
Q1	122	84.9394	16.1702	36.0947		Q1	32	17.8423	11.234	45.0704		Q1	46	33.1716	4.96111	34.8485		Q1	26	18.5962	2.94771	35.1351		Q1	4	6.0312	0.684072	16.6667		Q1	7	5.026	0.775304	35
Q2	95	94.4034	0.00377033	28.1065		Q2	16	19.8303	0.739837	22.5352		Q2	37	36.8676	0.000475479	28.0303		Q2	24	20.6682	0.5371	32.4324		Q2	8	6.7032	0.250879	33.3333		Q2	3	5.586	1.19717	15
Q3	68	79.43	1.64478	20.1183		Q3	10	16.685	2.67841	14.0845		Q3	27	31.02	0.520967	20.4545		Q3	17	17.39	0.00874641	22.973		Q3	5	5.64	0.0726241	20.8333		Q3	8	4.7	2.31702	40
Q4	53	79.2272	8.6822	15.6805		Q4	13	16.6424	0.797185	18.3099		Q4	22	30.9408	2.58358	16.6667		Q4	7	17.3456	6.17052	9.45946		Q4	7	5.6256	0.335782	29.1667		Q4	2	4.688	1.54124	10
	338	338	26.501	100			71	71	15.4494	100			132	132	8.06613	100			74	74	9.66408	100			24	24	1.34336	100			20	20	5.83074	100
p-value	7.49046e-06					p-value	0.0014702					p-value	0.0446647					p-value	0.0216484					p-value	0.718864					p-value	0.120142
U18 Female (2012 - 2015)						U18 Female (2012 - 2015; Allrounder)						U18 Female (2012 - 2015; Batters)						U18 Female (2012 - 2015; Pace Bowlers)						U18 Female (2012 - 2015; Spin Bowlers)						U18 Female (2012 - 2015; Wicket Keepers)
	Actual	Expected	X2	Actual %			Actual	Expected	X2	Actual %			Actual	Expected	X2	Actual %			Actual	Expected	X2	Actual %			Actual	Expected	X2	Actual %			Actual	Expected	X2	Actual %
Q1	140	95.2427	21.0328	36.9393		Q1	66	42.4697	13.0369	39.0533		Q1	23	16.8371	2.25581	34.3284		Q1	34	25.6326	2.73142	33.3333		Q1	6	5.026	0.188754	30		Q1	11	5.2773	6.20569	52.381
Q2	88	105.855	3.01158	23.219		Q2	41	47.2017	0.814824	24.2604		Q2	14	18.7131	1.18705	20.8955		Q2	22	28.4886	1.47785	21.5686		Q2	7	5.586	0.35793	35		Q2	4	5.8653	0.593208	19.0476
Q3	80	89.065	0.922632	21.1082		Q3	41	39.715	0.0415769	24.2604		Q3	11	15.745	1.42998	16.4179		Q3	18	23.97	1.4869	17.6471		Q3	5	4.7	0.0191489	25		Q3	5	4.935	0.00085613	23.8095
Q4	71	88.8376	3.58159	18.7335		Q4	21	39.6136	8.74614	12.426		Q4	19	15.7048	0.691403	28.3582		Q4	28	23.9088	0.700074	27.451		Q4	2	4.688	1.54124	10		Q4	1	4.9224	3.12555	4.7619
	379	379	28.5486	100			169	169	22.6395	100			67	67	5.56424	100			102	102	6.39624	100			20	20	2.10707	100			21	21	9.92531	100
p-value	2.78596e-06					p-value	4.80088e-05					p-value	0.134846					p-value	0.0938456					p-value	0.550483					p-value	0.0192118
U15 Female (2012 - 2015)						U15 Female (2012 - 2015; Allrounder)						U15 Female (2012 - 2015; Batters)						U15 Female (2012 - 2015; Pace Bowlers)						U15 Female (2012 - 2015; Spin Bowlers)						U15 Female (2012 - 2015; Wicket Keepers)
	Actual	Expected	X2	Actual %			Actual	Expected	X2	Actual %			Actual	Expected	X2	Actual %			Actual	Expected	X2	Actual %			Actual	Expected	X2	Actual %			Actual	Expected	X2	Actual %
Q1	141	93.9862	23.5173	37.7005		Q1	77	46.7418	19.5876	41.3978		Q1	27	16.5858	6.53906	40.9091		Q1	28	19.0988	4.1485	36.8421		Q1	6	6.7851	0.0908435	22.2222		Q1	3	4.7747	0.659635	15.7895
Q2	92	104.458	1.48583	24.5989		Q2	45	51.9498	0.929738	24.1935		Q2	10	18.4338	3.85862	15.1515		Q2	18	21.2268	0.490523	23.6842		Q2	13	7.5411	3.95162	48.1481		Q2	6	5.3067	0.090577	31.5789
Q3	81	87.89	0.540131	21.6578		Q3	44	43.71	0.00192404	23.6559		Q3	12	15.51	0.794333	18.1818		Q3	17	17.86	0.041411	22.3684		Q3	5	6.345	0.28511	18.5185		Q3	3	4.465	0.480677	15.7895
Q4	60	87.6656	8.73074	16.0428		Q4	20	43.5984	12.773	10.7527		Q4	17	15.4704	0.151236	25.7576		Q4	13	17.8144	1.30111	17.1053		Q4	3	6.3288	1.75087	11.1111		Q4	7	4.4536	1.45594	36.8421
	374	374	34.274	100			186	186	33.2923	100			66	66	11.3432	100			76	76	5.98154	100			27	27	6.07845	100			19	19	2.68682	100
p-value	1.73415e-07					p-value	2.79438e-07					p-value	0.0100075					p-value	0.112512					p-value	0.107855					p-value	0.442471
State Male (2012 - 2015)						State Male (2012 - 2015; Allrounder)						State Male (2012 - 2015; Batters)						State Male (2012 - 2015; Pace Bowlers)						State Male (2012 - 2015; Spin Bowlers)						State Male (2012 - 2015; Wicket Keepers)
	Actual	Expected	X2	Actual %			Actual	Expected	X2	Actual %			Actual	Expected	X2	Actual %			Actual	Expected	X2	Actual %			Actual	Expected	X2	Actual %			Actual	Expected	X2	Actual %
Q1	76	61.3172	3.51589	31.1475		Q1	15	9.8007	2.75824	38.4615		Q1	29	24.1248	0.985193	30.2083		Q1	19	18.3449	0.0233938	26.0274		Q1	8	6.0312	0.642687	33.3333		Q1	5	3.0156	1.30582	41.6667
Q2	60	68.1492	0.974472	24.5902		Q2	7	10.8927	1.39113	17.9487		Q2	24	26.8128	0.295077	25		Q2	22	20.3889	0.127307	30.137		Q2	5	6.7032	0.432762	20.8333		Q2	2	3.3516	0.54506	16.6667
Q3	47	57.34	1.86459	19.2623		Q3	8	9.165	0.148088	20.5128		Q3	19	22.56	0.561773	19.7917		Q3	14	17.155	0.58024	19.1781		Q3	4	5.64	0.476879	16.6667		Q3	2	2.82	0.23844	16.6667
Q4	61	57.1936	0.253327	25		Q4	9	9.1416	0.00219333	23.0769		Q4	24	22.5024	0.0996696	25		Q4	18	17.1112	0.0461666	24.6575		Q4	7	5.6256	0.335782	29.1667		Q4	3	2.8128	0.0124587	25
	244	244	6.60828	100			39	39	4.29965	100			96	96	1.94171	100			73	73	0.777107	100			24	24	1.88811	100			12	12	2.10178	100
p-value	0.0854886					p-value	0.230872					p-value	0.584592					p-value	0.854934					p-value	0.595951					p-value	0.551552
State Female (2012 - 2015)						State Female (2012 - 2015; Allrounder)						State Female (2012 - 2015; Batters)						State Female (2012 - 2015; Pace Bowlers)						State Female (2012 - 2015; Spin Bowlers)						State Female (2012 - 2015; Wicket Keepers)
	Actual	Expected	X2	Actual %			Actual	Expected	X2	Actual %			Actual	Expected	X2	Actual %			Actual	Expected	X2	Actual %			Actual	Expected	X2	Actual %			Actual	Expected	X2	Actual %
Q1	50	44.2288	0.753056	28.4091		Q1	18	15.3293	0.465294	29.5082		Q1	10	10.5546	0.0291419	23.8095		Q1	16	13.0676	0.658037	30.7692		Q1	3	2.7643	0.0200971	27.2727		Q1	3	2.513	0.0943768	30
Q2	50	49.1568	0.0144636	28.4091		Q2	16	17.0373	0.063155	26.2295		Q2	9	11.7306	0.635618	21.4286		Q2	19	14.5236	1.3797	36.5385		Q2	3	3.0723	0.00170143	27.2727		Q2	3	2.793	0.0153416	30
Q3	39	41.36	0.134662	22.1591		Q3	14	14.335	0.00782874	22.9508		Q3	14	9.87	1.72816	33.3333		Q3	9	12.22	0.848478	17.3077		Q3	0	2.585	2.585	0		Q3	2	2.35	0.0521277	20
Q4	37	41.2544	0.438739	21.0227		Q4	13	14.2984	0.117904	21.3115		Q4	9	9.8448	0.0724938	21.4286		Q4	8	12.1888	1.43952	15.3846		Q4	5	2.5784	2.27434	45.4545		Q4	2	2.344	0.0504846	20
	176	176	1.34092	100			61	61	0.654183	100			42	42	2.46541	100			52	52	4.32573	100			11	11	4.88113	100			10	10	0.212331	100
p-value	0.71944					p-value	0.883924					p-value	0.481575					p-value	0.228371					p-value	0.180711					p-value	0.975575

## Sheet: OVERALL
Male (2012 - 2015)						Male (2012 - 2015; Allrounder)						Male (2012 - 2015; Batters)						Male (2012 - 2015; Pace Bowlers)						15 Male (2012 - 2015; Spin Bowlers)						Male (2012 - 2015; Wicket Keepers)
	Actual	Expected	X2	Actual %			Actual	Expected	X2	Actual %			Actual	Expected	X2	Actual %			Actual	Expected	X2	Actual %			Actual	Expected	X2	Actual %			Actual	Expected	X2	Actual %
Q1	437	310.5	51.537	35.1852		Q1	90	55.5	21.4459	40.5405		Q1	168	123.5	16.0344	34.0081		Q1	122	76.75	26.6783	39.7394		Q1	30	31.75	0.0964567	23.622		Q1	20	18.5	0.121622	27.027
Q2	322	310.5	0.425926	25.9259		Q2	53	55.5	0.112613	23.8739		Q2	138	123.5	1.70243	27.9352		Q2	78	76.75	0.0203583	25.4072		Q2	35	31.75	0.332677	27.5591		Q2	10	18.5	3.90541	13.5135
Q3	247	310.5	12.9863	19.8873		Q3	36	55.5	6.85135	16.2162		Q3	103	123.5	3.40283	20.8502		Q3	62	76.75	2.83469	20.1954		Q3	26	31.75	1.04134	20.4724		Q3	19	18.5	0.0135135	25.6757
Q4	236	310.5	17.8752	19.0016		Q4	43	55.5	2.81532	19.3694		Q4	85	123.5	12.002	17.2065		Q4	45	76.75	13.1344	14.658		Q4	36	31.75	0.568898	28.3465		Q4	25	18.5	2.28378	33.7838
	1242	1242	82.8245	100			222	222	31.2252	100			494	494	33.1417	100			307	307	42.6678	100			127	127	2.03937	100			74	74	6.32432	100
p-value	7.60439e-18					p-value	7.62107e-07					p-value	3.00646e-07					p-value	2.895e-09					p-value	0.564276					p-value	0.0968542
Female (2012 - 2015)						Female (2012 - 2015; Allrounder)						Female (2012 - 2015; Batters)						Female (2012 - 2015; Pace Bowlers)						Female (2012 - 2015; Spin Bowlers)						Female (2012 - 2015; Wicket Keepers)
	Actual	Expected	X2	Actual %			Actual	Expected	X2	Actual %			Actual	Expected	X2	Actual %			Actual	Expected	X2	Actual %			Actual	Expected	X2	Actual %			Actual	Expected	X2	Actual %
Q1	281	188.25	45.6975	37.3174		Q1	143	88.75	33.1613	40.2817		Q1	50	33.25	8.43797	37.594		Q1	62	44.5	6.88202	34.8315		Q1	12	11.75	0.00531915	25.5319		Q1	14	10	1.6	35
Q2	180	188.25	0.361554	23.9044		Q2	86	88.75	0.0852113	24.2254		Q2	24	33.25	2.57331	18.0451		Q2	40	44.5	0.455056	22.4719		Q2	20	11.75	5.79255	42.5532		Q2	10	10	0	25
Q3	161	188.25	3.94456	21.3811		Q3	85	88.75	0.158451	23.9437		Q3	23	33.25	3.15977	17.2932		Q3	35	44.5	2.02809	19.6629		Q3	10	11.75	0.260638	21.2766		Q3	8	10	0.4	20
Q4	131	188.25	17.4107	17.3971		Q4	41	88.75	25.6908	11.5493		Q4	36	33.25	0.227444	27.0677		Q4	41	44.5	0.275281	23.0337		Q4	5	11.75	3.87766	10.6383		Q4	8	10	0.4	20
	753	753	67.4143	100			355	355	59.0958	100			133	133	14.3985	100			178	178	9.64045	100			47	47	9.93617	100			40	40	2.4	100
p-value	1.5268e-14					p-value	9.17075e-13					p-value	0.00240998					p-value	0.0218832					p-value	0.0191166					p-value	0.493635
Cricketer (2012 - 2015)						Allrounder (2012 - 2015)						Batters (2012 - 2015)						Pace Bowlers (2012 - 2015)						Spin Bowlers (2012 - 2015)						Wicketkeepers (2012 - 2015)
	Actual	Expected	X2	Actual %			Actual	Expected	X2	Actual %			Actual	Expected	X2	Actual %			Actual	Expected	X2	Actual %			Actual	Expected	X2	Actual %			Actual	Expected	X2	Actual %
Q1	718	498.75	96.3821	35.99		Q1	233	144.25	54.6036	40.3813		Q1	218	156.75	23.9334	34.7687		Q1	184	121.25	32.4747	37.9381		Q1	42	43.5	0.0517241	24.1379		Q1	34	28.5	1.0614	29.8246
Q2	502	498.75	0.0211779	25.1629		Q2	139	144.25	0.191075	24.0901		Q2	162	156.75	0.175837	25.8373		Q2	118	121.25	0.0871134	24.3299		Q2	55	43.5	3.04023	31.6092		Q2	20	28.5	2.53509	17.5439
Q3	408	498.75	16.5124	20.4511		Q3	121	144.25	3.7474	20.9705		Q3	126	156.75	6.0323	20.0957		Q3	97	121.25	4.85	20		Q3	36	43.5	1.2931	20.6897		Q3	27	28.5	0.0789474	23.6842
Q4	367	498.75	34.8031	18.396		Q4	84	144.25	25.1651	14.5581		Q4	121	156.75	8.15351	19.2982		Q4	86	121.25	10.2479	17.732		Q4	41	43.5	0.143678	23.5632		Q4	33	28.5	0.710526	28.9474
	1995	1995	147.719	100			577	577	83.7071	100			627	627	38.2951	100			485	485	47.6598	100			174	174	4.52874	100			114	114	4.38596	100
p-value	8.18162e-32					p-value	4.91646e-18					p-value	2.44778e-08					p-value	2.51574e-10					p-value	0.209741					p-value	0.22269
244
176
2415

## Sheet: Graphs
Male																												U15 Female	U18 Female	State Female
Birth Quartiles																						Under 15 Male	Under 17 Male	Under 19 Male	State Male			Actual %	Actual %	Actual %
Allrounder	n	1	Q1	2	Q2	3	Q3	4	Q4	X2	p-value										Q1	36.0947	35.5408	34.1463	31.1475		Q1	37.7005	36.9393	28.4091
State Under 15	71	32	45.0704	16	22.5352	10	14.0845	13	18.3099												Q2	28.1065	24.2826	25.9424	24.5902		Q2	24.5989	23.219	28.4091
State Under 17	79	34	43.038	18	22.7848	13	16.4557	14	17.7215												Q3	20.1183	19.8675	19.7339	19.2623		Q3	21.6578	21.1082	22.1591
State Under 19	72	24	33.3333	19	26.3889	13	18.0556	16	22.2222												Q4	15.6805	20.3091	20.1774	25		Q4	16.0428	18.7335	21.0227
State Level	39	15	38.4615	7	17.9487	8	20.5128	9	23.0769													100	100	100	100			100	100	100
Batter
State Under 15	132	46	34.8485	37	28.0303	27	20.4545	22	16.6667
State Under 17	180	60	33.3333	49	27.2222	37	20.5556	34	18.8889													U15 Male (2012 - 2015; Allrounder)	U17 Male (2012 - 2015; Allrounder)	U19 Male (2012 - 2015; Allrounder)	State Male (2012 - 2015; Allrounder)		U15 Male (2012 - 2015; Pace Bowlers)	U17 Male (2012 - 2015; Pace Bowlers)	U19 Male (2012 - 2015; Pace Bowlers)	State Male (2012 - 2015; Pace Bowlers)		U15 Male (2012 - 2015; Wicket Keepers)	U17 Male (2012 - 2015; Wicket Keepers)	U17 Male (2012 - 2015; Wicket Keepers)	State Male (2012 - 2015; Wicket Keepers)
State Under 19	182	62	34.0659	52	28.5714	39	21.4286	29	15.9341													Actual %	Actual %	Actual %	Actual %		Actual %	Actual %	Actual %	Actual %		Actual %	Actual %	Actual %	Actual %
State Level	96	29	30.2083	24	25	19	19.7917	24	25												Q1	45.0704	43.038	33.3333	38.4615		35.1351	40.8333	41.5929	26.0274		35	20.8333	26.6667	41.6667
Pace Bowler																					Q2	22.5352	22.7848	26.3889	17.9487		32.4324	23.3333	23.0088	30.137		15	12.5	13.3333	16.6667
State Under 15	74	26	35.1351	24	32.4324	17	22.973	7	9.45946												Q3	14.0845	16.4557	18.0556	20.5128		22.973	20	18.5841	19.1781		40	25	16.6667	16.6667
State Under 17	120	49	40.8333	28	23.3333	24	20	19	15.8333												Q4	18.3099	17.7215	22.2222	23.0769		9.45946	15.8333	16.8142	24.6575		10	41.6667	43.3333	25
State Under 19	113	47	41.5929	26	23.0088	21	18.5841	19	16.8142													100	100	100	100		100	100	100	100		100	100	100	100
State Level	73	19	26.0274	22	30.137	14	19.1781	18	24.6575
Spin Bowler
State Under 15	24	4	16.6667	8	33.3333	5	20.8333	7	29.1667													U15 Male (2012 - 2015; Batters)	U17 Male (2012 - 2015; Batters)	U19 Male (2012 - 2015; Batters)	State Male (2012 - 2015; Batters)		U15 Male (2012 - 2015; Spin Bowlers)	U17 Male (2012 - 2015; Spin Bowlers)	U19 Male (2012 - 2015; Spin Bowlers)	State Male (2012 - 2015; Spin Bowlers)
State Under 17	49	13	26.5306	11	22.449	10	20.4082	15	30.6122													Actual %	Actual %	Actual %	Actual %		Actual %	Actual %	Actual %	Actual %
State Under 19	54	13	24.0741	16	29.6296	11	20.3704	14	25.9259												Q1	34.8485	33.3333	34.0659	30.2083		16.6667	26.5306	24.0741	33.3333
State Level	24	8	33.3333	5	20.8333	4	16.6667	7	29.1667												Q2	28.0303	27.2222	28.5714	25		33.3333	22.449	29.6296	20.8333
Wicketkeeper																					Q3	20.4545	20.5556	21.4286	19.7917		20.8333	20.4082	20.3704	16.6667
State Under 15	20	7	35	3	15	8	40	2	10												Q4	16.6667	18.8889	15.9341	25		29.1667	30.6122	25.9259	29.1667
State Under 17	24	5	20.8333	3	12.5	6	25	10	41.6667													100	100	100	100		100	100	100	100
State Under 19	30	8	26.6667	4	13.3333	5	16.6667	13	43.3333
State Level	12	5	41.6667	2	16.6667	2	16.6667	3	25
Female
Birth Quartiles
Allrounder	n	1	Q1	2	Q2	3	Q3	4	Q4	X2	p-value
State Under 15	186	77	41.3978	45	24.1935	44	23.6559	20	10.7527
State Under 18	169	66	39.0533	41	24.2604	41	24.2604	21	12.426
State Level	61	18	29.5082	16	26.2295	14	22.9508	13	21.3115
Batter
State Under 15	66	27	40.9091	10	15.1515	12	18.1818	17	25.7576													U15 Female (2012 - 2015; Allrounder)	U18 Female (2012 - 2015; Allrounder)	State Female (2012 - 2015; Allrounder)		U15 Female (2012 - 2015; Batters)	U18 Female (2012 - 2015; Batters)	State Female (2012 - 2015; Batters)		U15 Female (2012 - 2015; Pace Bowlers)	U18 Female (2012 - 2015; Pace Bowlers)	State Female (2012 - 2015; Pace Bowlers)		U15 Female (2012 - 2015; Spin Bowlers)	U18 Female (2012 - 2015; Spin Bowlers)	State Female (2012 - 2015; Spin Bowlers)		U15 Female (2012 - 2015; Wicket Keepers)	U18 Female (2012 - 2015; Wicket Keepers)	State Female (2012 - 2015; Wicket Keepers)
State Under 18	67	23	34.3284	14	20.8955	11	16.4179	19	28.3582													Actual %	Actual %	Actual %		Actual %	Actual %	Actual %		Actual %	Actual %	Actual %		Actual %	Actual %	Actual %		Actual %	Actual %	Actual %
State Level	42	10	23.8095	9	21.4286	14	33.3333	9	21.4286												Q1	41.3978	39.0533	29.5082		40.9091	34.3284	23.8095		36.8421	33.3333	30.7692		22.2222	30	27.2727		15.7895	52.381	30
																					Q2	24.1935	24.2604	26.2295		15.1515	20.8955	21.4286		23.6842	21.5686	36.5385		48.1481	35	27.2727		31.5789	19.0476	30
Pace Bowler																					Q3	23.6559	24.2604	22.9508		18.1818	16.4179	33.3333		22.3684	17.6471	17.3077		18.5185	25	0		15.7895	23.8095	20
State Under 15	76	28	36.8421	18	23.6842	17	22.3684	13	17.1053												Q4	10.7527	12.426	21.3115		25.7576	28.3582	21.4286		17.1053	27.451	15.3846		11.1111	10	45.4545		36.8421	4.7619	20
State Under 18	102	34	33.3333	22	21.5686	18	17.6471	28	27.451													100	100	100		100	100	100		100	100	100		100	100	100		100	100	100
State Level	52	16	30.7692	19	36.5385	9	17.3077	8	15.3846
Spin Bowler
State Under 15	27	6	22.2222	13	48.1481	5	18.5185	3	11.1111
State Under 18	20	6	30	7	35	5	25	2	10												Q1
State Level	11	3	27.2727	3	27.2727	0	0	5	45.4545												Q2
																					Q3
Wicketkeeper																					Q4
State Under 15	19	3	15.7895	6	31.5789	3	15.7895	7	36.8421
State Under 18	21	11	52.381	4	19.0476	5	23.8095	1	4.7619
State Level	10	3	27.2727	3	27.2727	2	0	2	45.4545
																					Q1
																					Q2
																					Q3
																					Q4
